# Supplementary material
Source: PubMed Central journal article supplement (PMC10524333)
Supplement: NIHMS1901812-supplement-FS1.pdf [file NIHMS1901812-supplement-FS1.pdf]

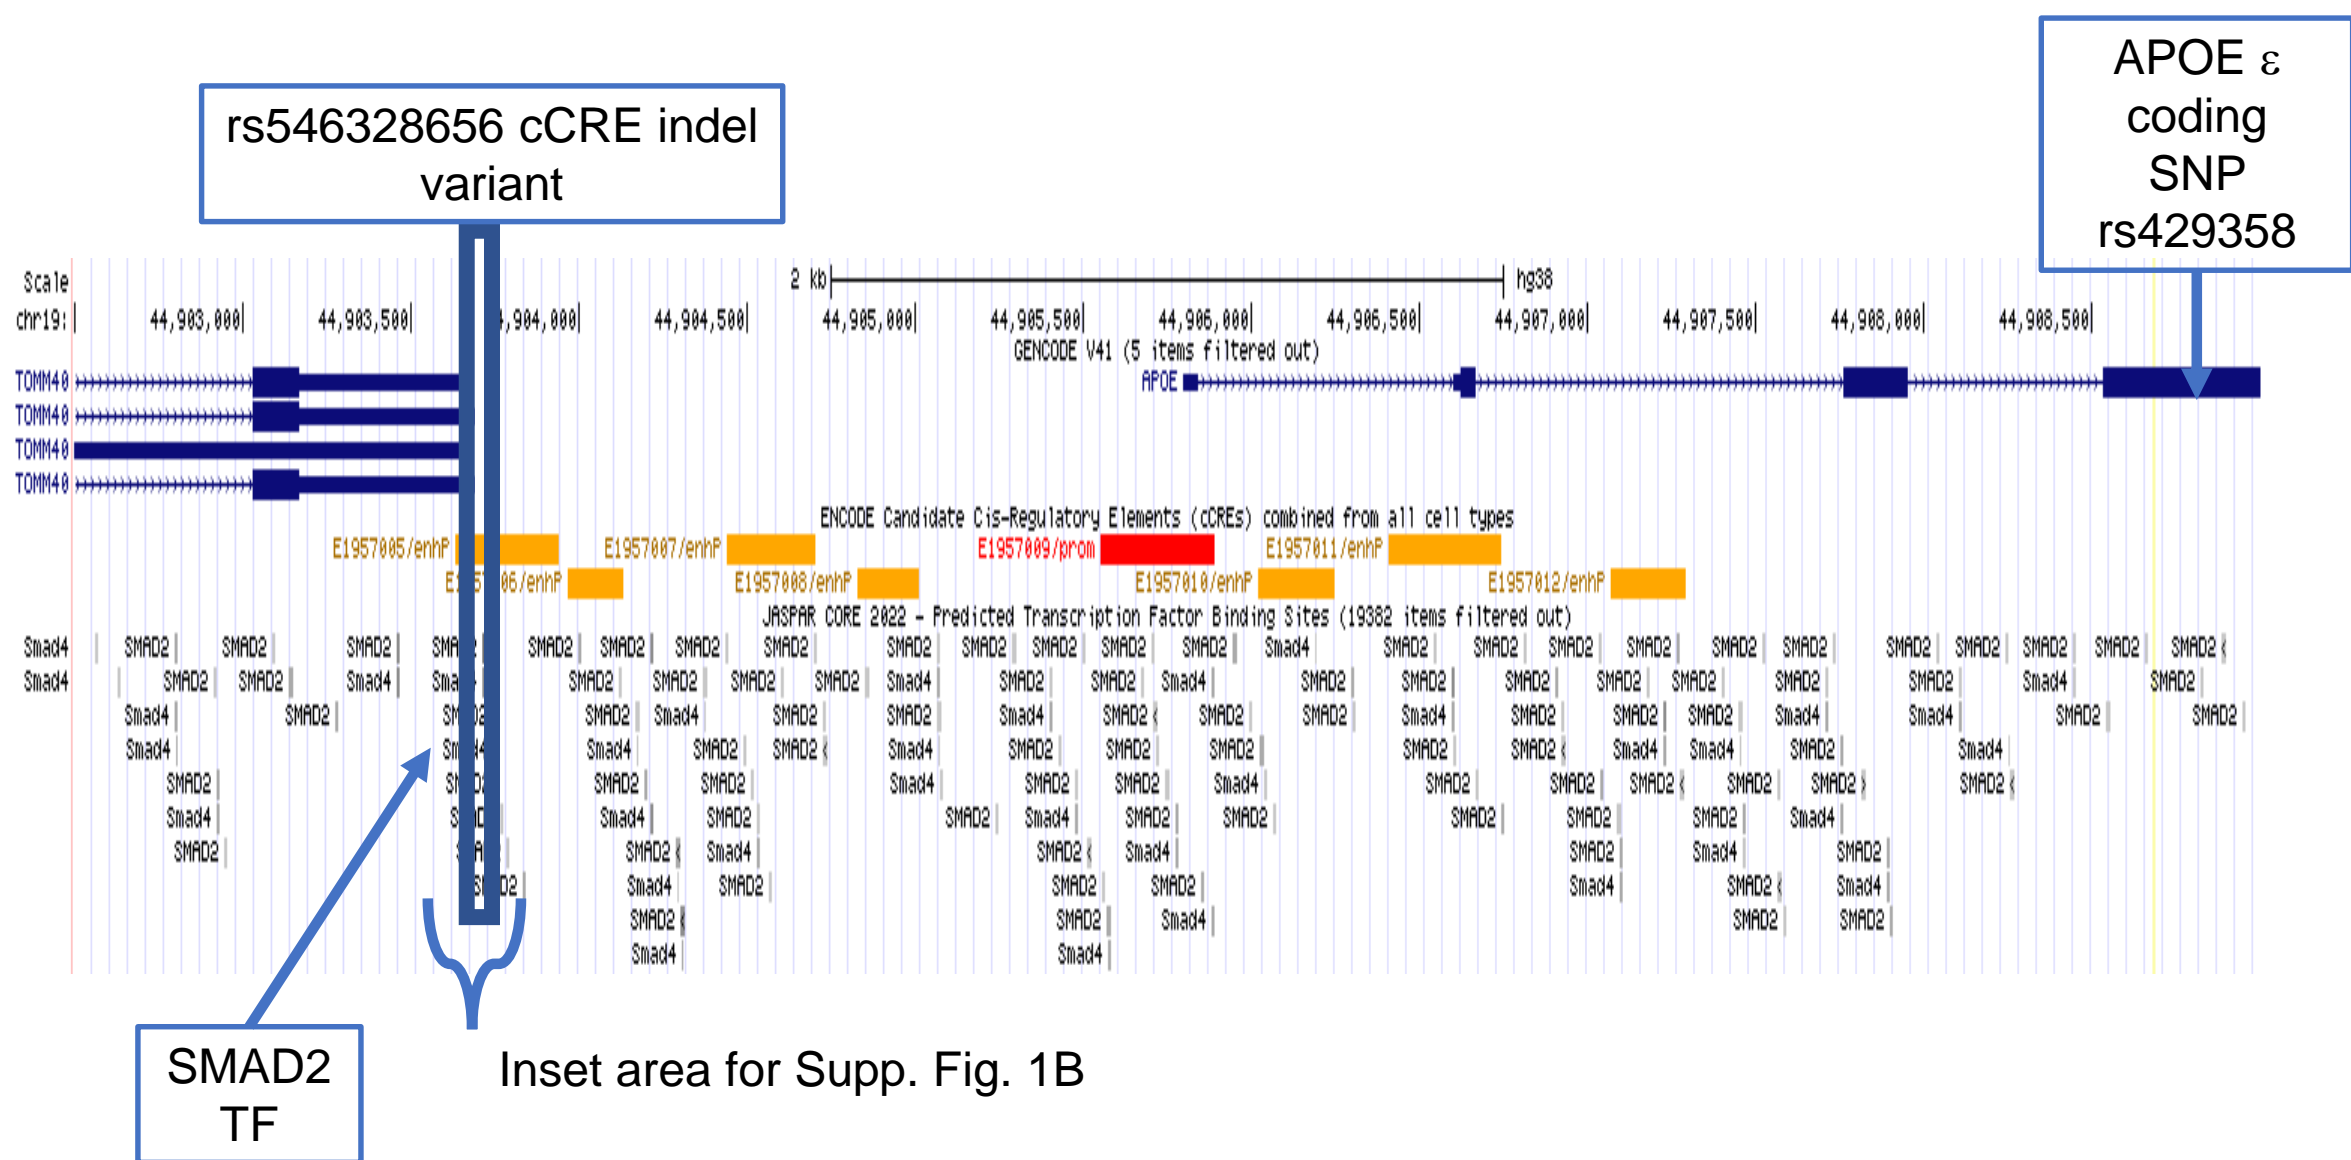

**Supplemental Figure 1A. APOE LOAD GWAS locus.** Genome browser view of the of SSV deletion variant (rs546328656) disruption of the SMAD2 TF. Tracks include (upper to lower): gene structure (GENCODE V41); candidate cCREs (ENCODE) TFs from the JASPAR core collection; and SSVs from short genetic variants (dbSNP153). Displayed genomic region includes the APOE  $\epsilon$ 4 coding SNP (rs429358) and the deletion variant (rs546328656) located in the enhancer element (E1957005).

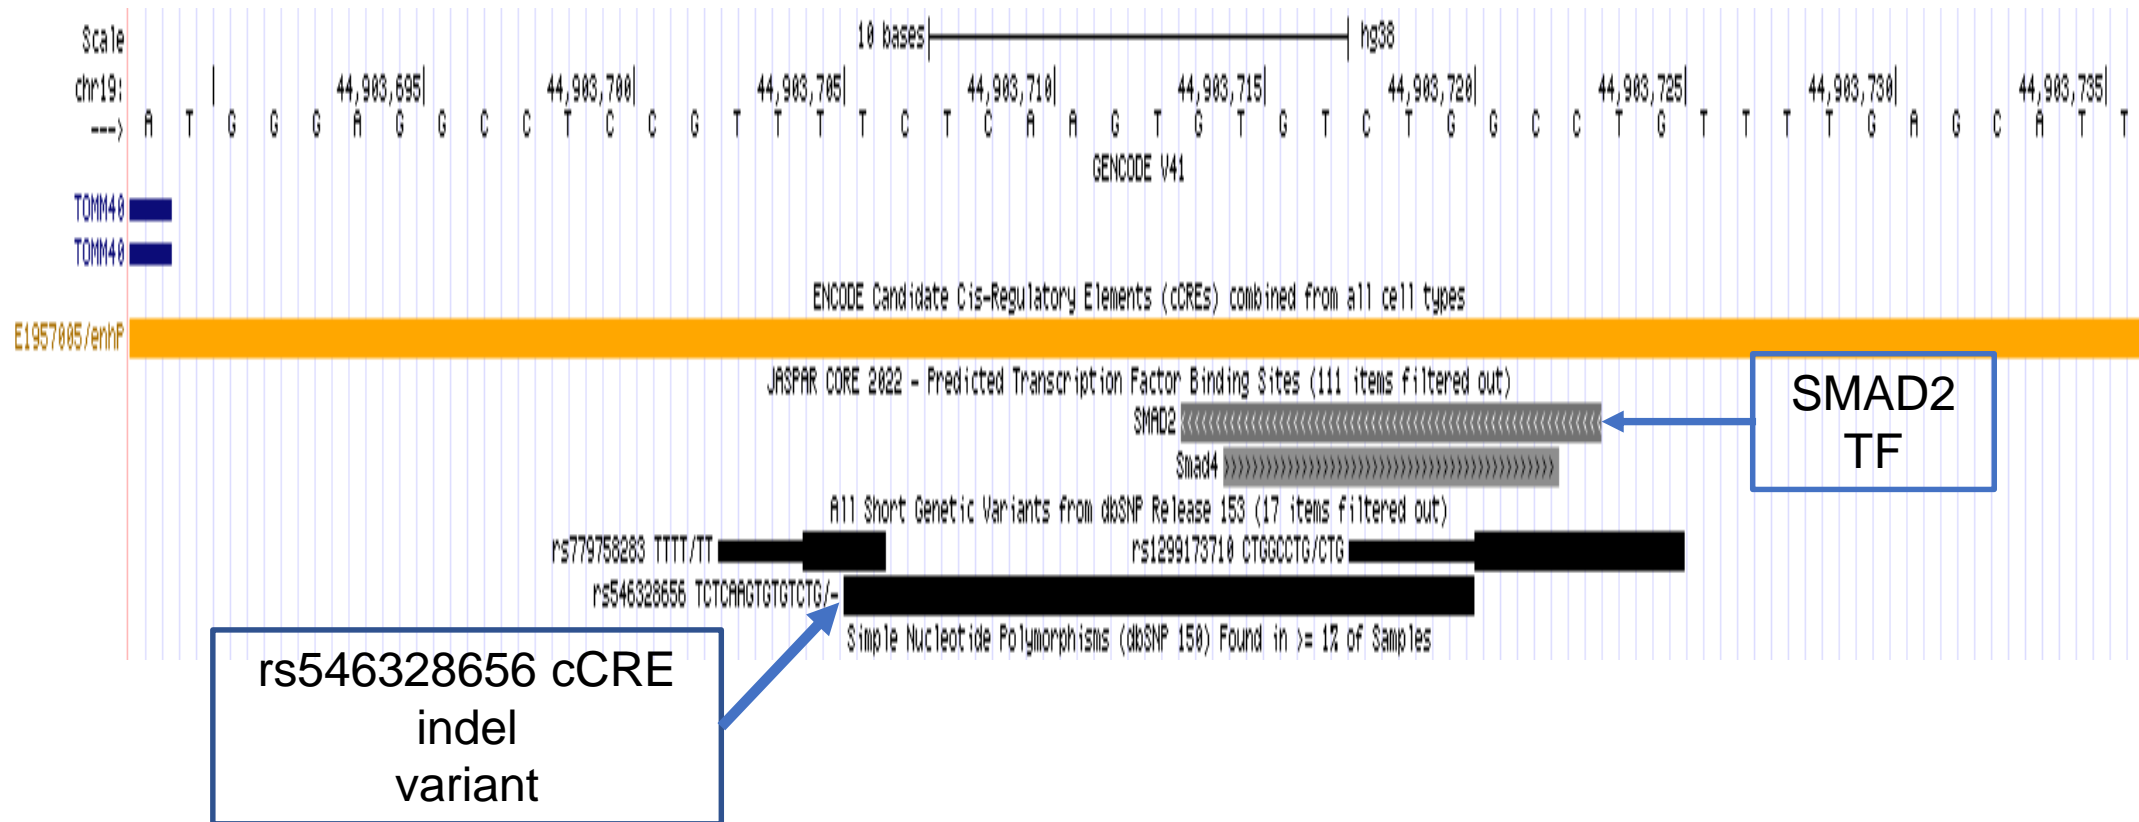

**Supplemental Figure 1B. APOE LOAD GWAS locus.** Genome browser view of the of SSV deletion variant (rs546328656) disruption of the SMAD2 TF. Tracks include (upper to lower): gene structure (GENCODE V41); candidate cCCREs (ENCODE) TFs from the JASPAR core collection; and SSVs from short genetic variants (dbSNP153). Inset shows detail surrounding the enhancer SSV (rs546328656).
