# Supplementary material
Source: PubMed Central journal article supplement (PMC10524333)
Supplement: NIHMS1901812-supplement-FS2.pdf [file NIHMS1901812-supplement-FS2.pdf]

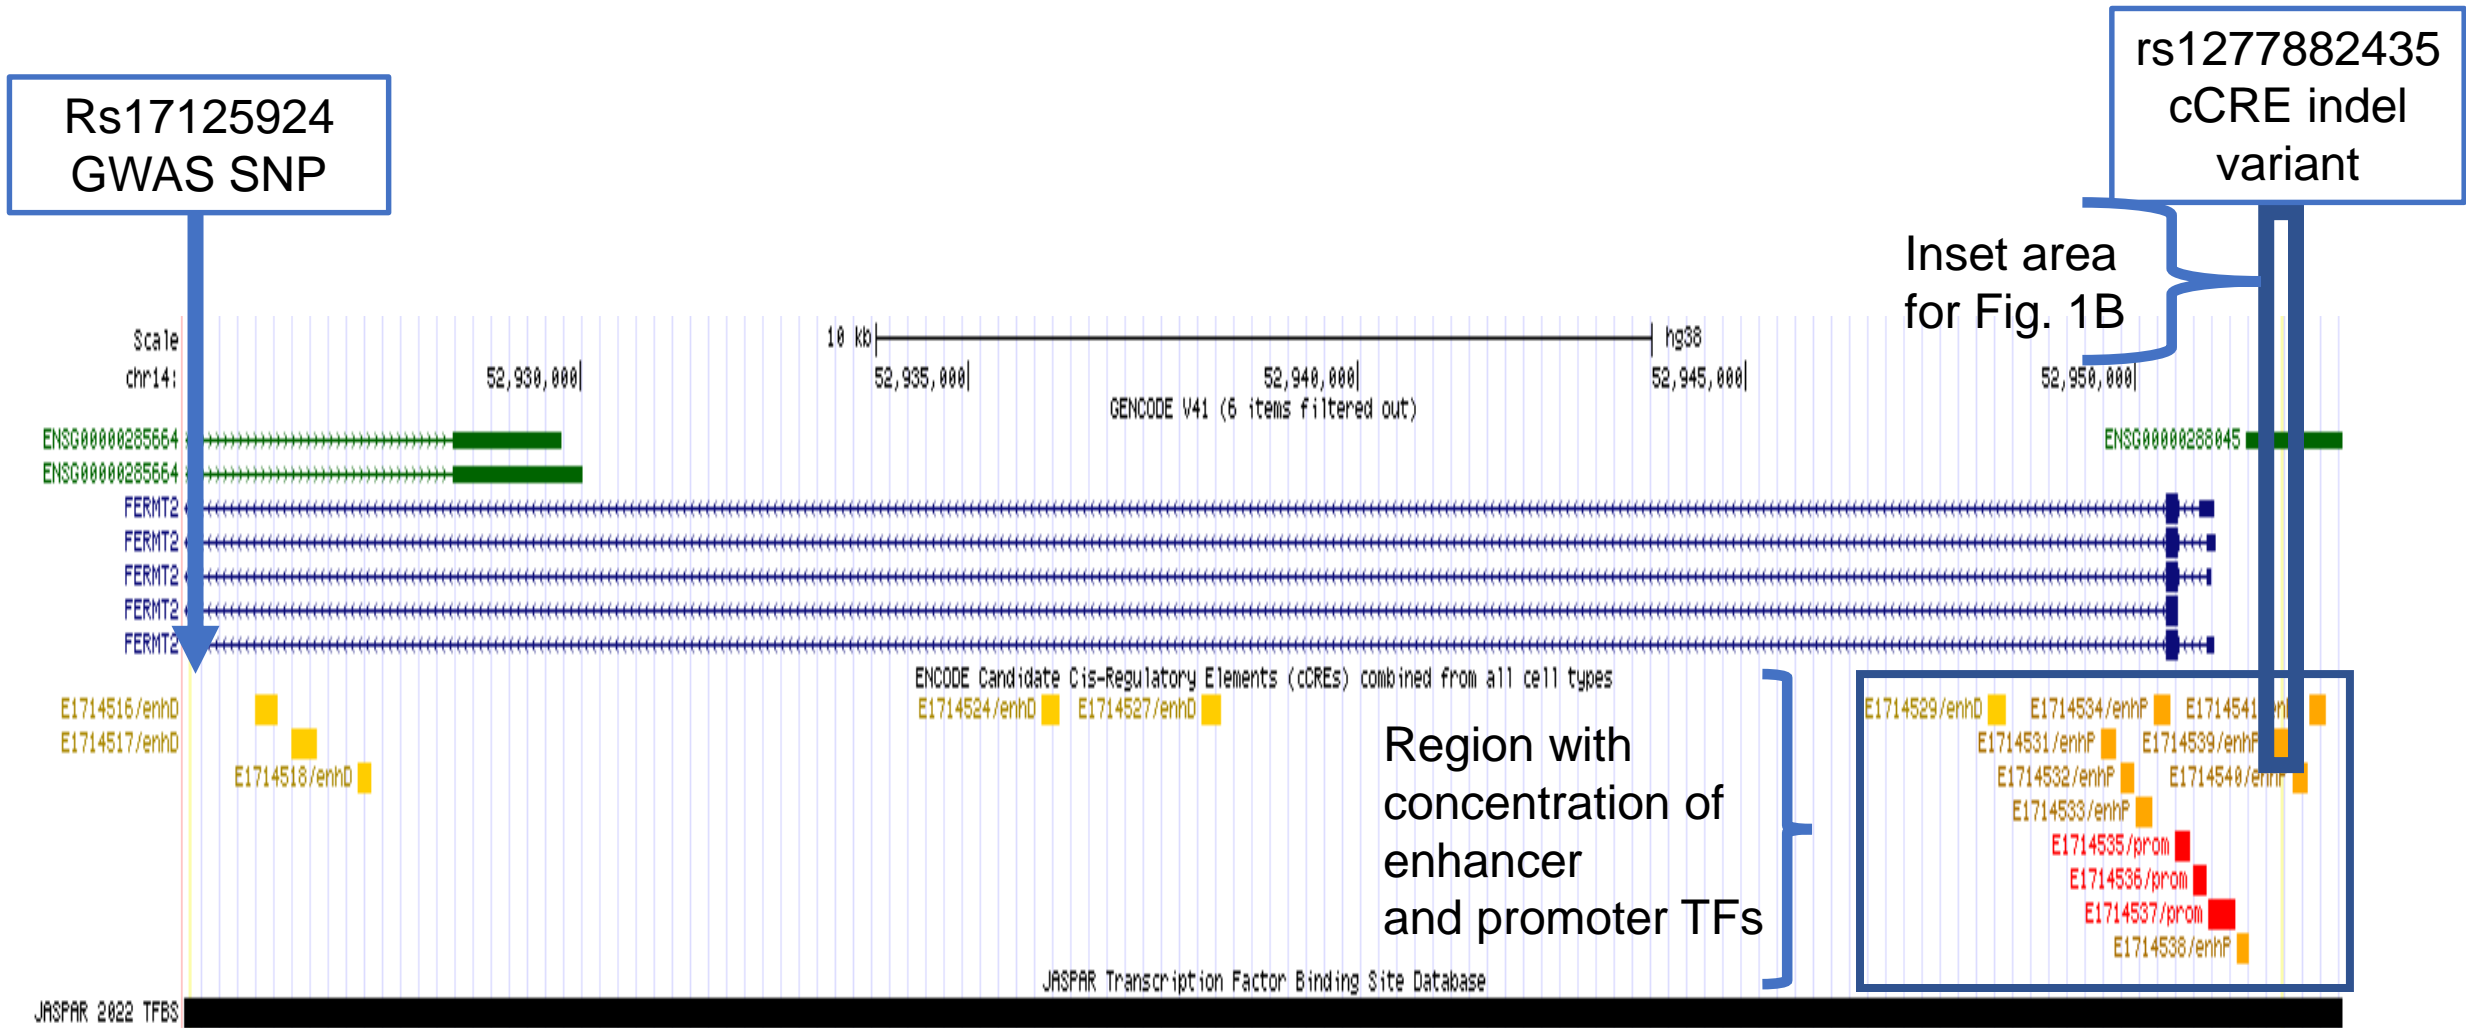

**Supplemental Figure 2A. *FERMT2* LOAD GWAS locus.** Genome browser view of SSV deletion variant (rs1277882435) disruption of the *TAL1* transcription factor. Tracks include (upper to lower): gene structure (GENCODE V41); candidate cCCREs (ENCODE) TFs from the JASPAR core collection; and SSVs from short genetic variants (dbSNP153). The deletion disrupts the *TAL1* TF. Displayed genomic region includes the GWAS SNP (rs17125924) and the indel variant (rs1277882435) located in the enhancer element (E1714539).
